# Supplementary material
Source: Springer Nature journal article supplement (https://www.springermedizin.de/resource/supplementary/13012_2009_227_MOESM1_ESM.pdf/9629506)

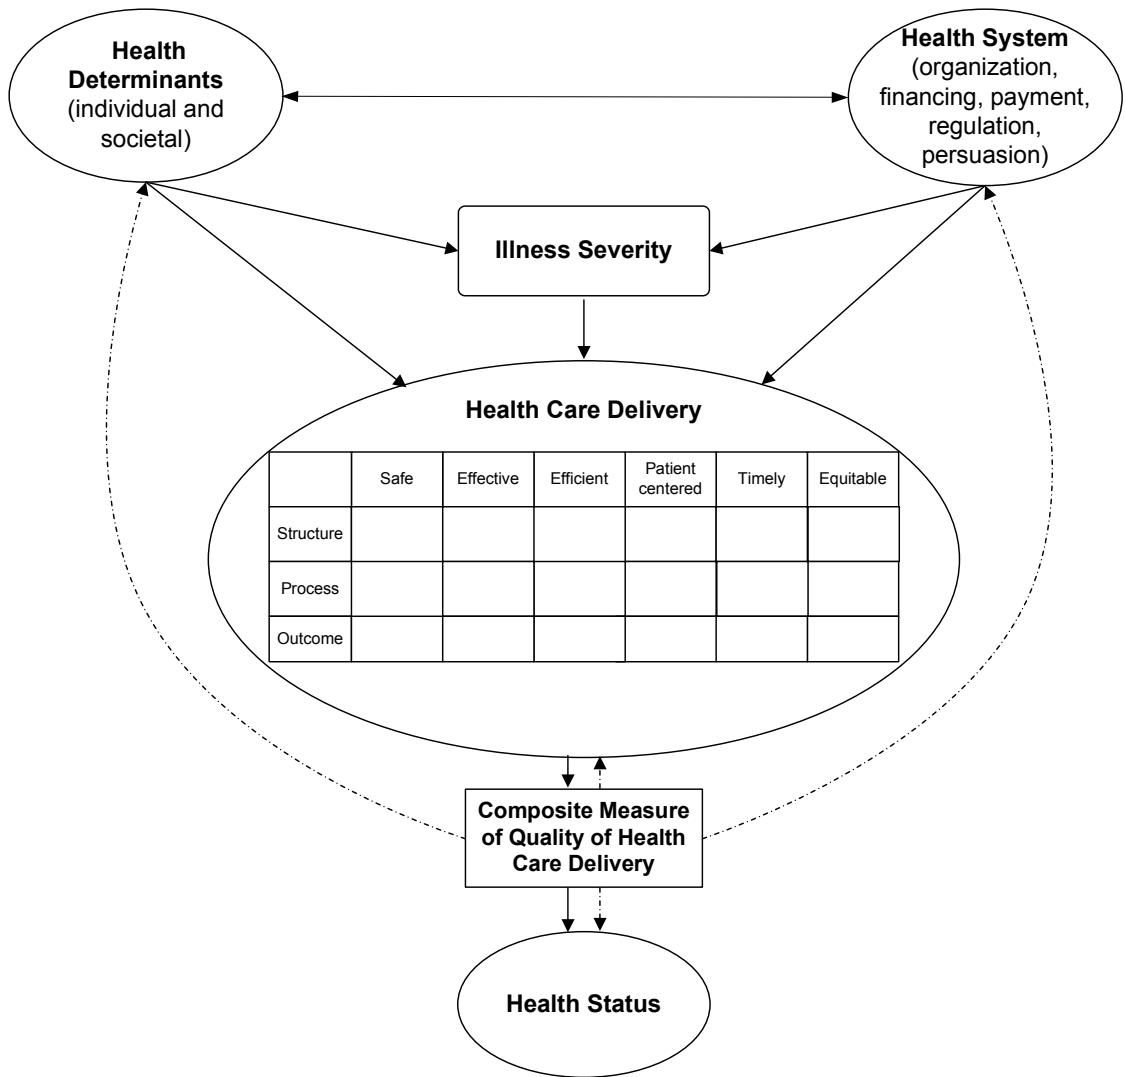

Supplement: MOESM1 [file 9629506]
